# Supplementary material for: The power of microdroplet photochemistry
Source: Royal Society of Chemistry journal article supplement (doi:10.1039/d4sc00056k), 2024-01-01
Supplement: d4sc00056k1.pdf [file d4sc00056k1.pdf]

## **Supporting Information**

### **The Power of Microdroplet Photochemistry**

Xiaowei Song<sup>a</sup> and Richard N. Zare<sup>a,\*</sup>

<sup>a</sup>Department of Chemistry, Stanford University, Stanford, California 94305 USA

\* Correspondence Author: [zare@stanford.edu](mailto:zare@stanford.edu)

---

#### Table of Contents

Reaction kinetics calculation

S2.

The time for the microdroplet to travel to the inlet of the mass spectrometer is varied by simply changing the distance between the sprayer and the mass spectrometer inlet. The velocity has been previously measured to be about 80 m/s [1]. The following data were obtained: For the bulk reaction and that for the sprayed droplets we measure in that order:

| Time (sec) | Substrate $m/z$ 281.2535 | Product $m/z$ 339.29 | Yield (%) |
|------------|--------------------------|----------------------|-----------|
| 2          | 2.04E+06                 | 1.07E+03             | 0.04926   |
| 7          | 1.55E+06                 | 2.83E+03             | 0.15705   |
| 17         | 8.07E+05                 | 3.02E+03             | 0.254     |
| 47         | 7.90E+05                 | 1.51E+04             | 0.80749   |
| 107        | 3.21E+05                 | 2.53E+04             | 1.07614   |

| time ( $\mu$ sec) | distance (mm) | Substrate $m/z$ 281.253 | Product $m/z$ 339.29 | Yield (%) |
|-------------------|---------------|-------------------------|----------------------|-----------|
| 125               | 10            | 1.57E+05                | 9.85                 | 0.01      |
| 250               | 20            | 5.71E+04                | 3.15E+01             | 0.06      |
| 375               | 30            | 7.10E+04                | 6.69E+01             | 0.09      |
| 500               | 40            | 4.62E+04                | 6.65E+01             | 0.14      |
| 750               | 60            | 3.45E+04                | 1.12E+02             | 0.32      |

We compared the reaction time for about the same yield to determine the rate of acceleration:

Bulk: 7 sec (0.16%)

Microdroplet: 500  $\mu$ sec (0.14%)

## REFERENCE

[1] Lee, J.K., Kim, S., Nam, H.G. and Zare, R.N., 2015. Microdroplet fusion mass spectrometry for fast reaction kinetics. *Proceedings of the National Academy of Sciences*, 112, 3898-3903.
